# Supplementary material
Source: PubMed Central journal article supplement (PMC6116100)
Supplement: DS_10.1177_1941738118777488.pdf [file DS_10.1177_1941738118777488.pdf]

**Table A1.** Study characteristics

| Study                             | Year | Participants, N | Subject Characteristics                                                      | Sport                                                                                                                               |
|-----------------------------------|------|-----------------|------------------------------------------------------------------------------|-------------------------------------------------------------------------------------------------------------------------------------|
| Dellavale and Haas <sup>10</sup>  | 2014 | 40              | -Female<br>-≥18 years old                                                    | College rowers                                                                                                                      |
| Friedmann et al <sup>20</sup>     | 2001 | 40              | Female (n = 23) and male (n = 17)<br>-13-25 years old                        | -Elite middle/long-distance running<br>-Elite triathlon<br>-Elite cycling<br>-Elite rowing<br>-Elite swimming<br>-Elite game sports |
| Hinton and Sinclair <sup>27</sup> | 2007 | 20              | -Female (n = 17) and male (n = 3)<br>-18-41 years old                        | Recreationally trained                                                                                                              |
| Yoshida et al <sup>47</sup>       | 1990 | 12              | -Female<br>-18-20 years old                                                  | Distance runners                                                                                                                    |
| Rowland et al <sup>39</sup>       | 1988 | 14              | -Female                                                                      | High school cross-country runners                                                                                                   |
| LaManca and Haymes <sup>29</sup>  | 1993 | 20              | -Female<br>-18-35 years old                                                  | Various athletic teams/clubs                                                                                                        |
| Blee et al <sup>4</sup>           | 1999 | 15              | -Female<br>-16-22 years old                                                  | Elite netball                                                                                                                       |
| Burden et al <sup>5</sup>         | 2014 | 15              | - Female (n = 9), male (n = 6)<br>- Female: 21 ± 2 years, male: 20 ± 1 years | Endurance runners                                                                                                                   |
| Fogelholm et al <sup>18</sup>     | 1992 | 33              | -Female<br>-17-31 years old                                                  | -Long distance running/orienteering<br>-Football<br>-Finnish baseball<br>-Basketball<br>-Handball                                   |
| Newhouse et al <sup>34</sup>      | 1989 | 40              | -Female<br>-18-40                                                            | Endurance runners                                                                                                                   |

|                                |      |    |                             |                                    |
|--------------------------------|------|----|-----------------------------|------------------------------------|
| Peeling et al <sup>36</sup>    | 2007 | 16 | -Female<br>-15-35 years old | -Running<br>-Cycling<br>-Triathlon |
| Klingshirn et al <sup>28</sup> | 1992 | 18 | -Female<br>-22-39 years old | Runners                            |

**Table A2.** Effects on performance<sup>a</sup>

| Study                             | Participants, N | Treatment Effect on Performance                                                                                                                                       |
|-----------------------------------|-----------------|-----------------------------------------------------------------------------------------------------------------------------------------------------------------------|
| Dellavale and Haas <sup>10</sup>  | 40              | -Improved energy expenditure, and gross energetic efficiency                                                                                                          |
| Friedmann et al <sup>20</sup>     | 40              | -Improved VO <sub>2</sub> max and increased O <sub>2</sub> consumption                                                                                                |
| Hinton and Sinclair <sup>27</sup> | 20              | Prevented decline in ventilator threshold<br>-Increased gross energetic efficiency                                                                                    |
| Yoshida et al <sup>47</sup>       | 12              | -Improved running velocity at lactate threshold, running velocity at onset of blood lactate accumulation, and race pace in 3000-m running performance                 |
| Rowland et al <sup>39</sup>       | 14              | Improved treadmill endurance times                                                                                                                                    |
| LaManca and Haymes <sup>29</sup>  | 20              | Improved VO <sub>2</sub> max                                                                                                                                          |
| Blee et al <sup>4</sup>           | 15              | No improvement in 10-second power, 6-second sprints, vertical jump or 20-m multistage shuttle run/predicted VO <sub>2</sub> max                                       |
| Burden et al <sup>5</sup>         | 15              | No improvement in VO <sub>2</sub> max, VO <sub>2</sub> max economy, speed, time to exhaustion, or rate perceived exertion                                             |
| Fogelholm et al <sup>18</sup>     | 33              | No improvement in VO <sub>2</sub> max, heart rate or O <sub>2</sub> consumption                                                                                       |
| Newhouse et al <sup>34</sup>      | 40              | No improvement in wingate cycle ergometer test, anaerobic speed test, ventilator threshold, VO <sub>2</sub> max, or maximal treadmill velocity                        |
| Peeling et al <sup>36</sup>       | 16              | No improvement in 10-min steady-state submaximal economy test, VO <sub>2</sub> max, timed test to exhaustion at VO <sub>2</sub> max workload, and heart rate          |
| Klingshirn et al <sup>28</sup>    | 18              | No improvement in VO <sub>2</sub> max, time to exhaustion, O <sub>2</sub> consumption, respiratory exchange ratio, heart rate, or respiratory performance evaluation. |

<sup>a</sup>Shaded cells indicate studies with no improvement in performance.

**Table A3. Ferritin cutoffs<sup>a</sup>**

| <b>Study</b>                      | <b>Ferritin cutoff</b>                 |
|-----------------------------------|----------------------------------------|
| Dellavale and Haas <sup>10</sup>  | <20 ug/L                               |
| Friedmann et al <sup>20</sup>     | <20 ug/L                               |
| Hinton and Sinclair <sup>27</sup> | <16 ug/L                               |
| Yoshida et al <sup>47</sup>       | ≤20 ng/mL                              |
| Rowland et al <sup>39</sup>       | <20 ug/L                               |
| LaManca and Haymes <sup>29</sup>  | <20 ng/mL                              |
| Blee et al <sup>4</sup>           | <40 ug/L                               |
| Burden et al <sup>5</sup>         | Females: <30 mcg/L<br>Males: <40 mcg/L |
| Fogelholm et al <sup>18</sup>     | ≤25 ug/L                               |
| Newhouse et al <sup>34</sup>      | 20 ng/ml                               |
| Peeling et al <sup>36</sup>       | <35 ug/L                               |
| Klingshirn et al <sup>28</sup>    | <20 ng/mL                              |

<sup>a</sup>Shaded cells indicate studies with no improvement in performance.

**Table A4. Type of intervention<sup>a</sup>**

| <b>Study</b>                      | <b>Intervention</b>                             |
|-----------------------------------|-------------------------------------------------|
| Dellavale and Haas <sup>10</sup>  | Ferrous sulfate, 100 mg po daily                |
| Friedmann et al <sup>20</sup>     | Ferrous glycine sulfate, 100 mg po bid          |
| Hinton and Sinclair <sup>27</sup> | Ferrous sulfate, 100 mg po daily                |
| Yoshida et al <sup>47</sup>       | Ferrous citrate sodium succinate, 200 mg po tid |
| Rowland et al <sup>39</sup>       | Ferrous sulfate, 975 mg po daily                |
| LaManca and Haymes <sup>29</sup>  | Ferrous sulfate, 159 mg po bid                  |
| Blee et al <sup>4</sup>           | Ferrum H, 2 mg IM x 5 doses                     |
| Burden et al <sup>5</sup>         | Ferric carboxymaltose, 500 mg IV                |
| Fogelholm et al <sup>18</sup>     | Ferrous sulfate, 100 mg po daily                |

|                                |                                  |
|--------------------------------|----------------------------------|
| Newhouse et al <sup>34</sup>   | Ferrous sulfate, 320 mg po daily |
| Peeling et al <sup>36</sup>    | Ferrum H, 2 mg IM x 5 doses      |
| Klingshirn et al <sup>28</sup> | Ferrous sulfate, 160 mg po daily |

<sup>a</sup>Shaded cells indicate studies with no improvement in performance.

**Table A5.** Duration of treatment

| <b>Study</b>                      | <b>Duration of treatment</b> |
|-----------------------------------|------------------------------|
| Dellavale and Haas <sup>10</sup>  | 6 weeks                      |
| Friedmann et al <sup>20</sup>     | 12 weeks                     |
| Hinton and Sinclair <sup>27</sup> | 6 weeks                      |
| Yoshida et al <sup>47</sup>       | 8 weeks                      |
| Rowland et al <sup>39</sup>       | 4 weeks                      |
| LaManca and Haymes <sup>29</sup>  | 8 weeks                      |
| Blee et al <sup>4</sup>           | 10 days                      |
| Burden et al <sup>5</sup>         | 4 weeks                      |
| Fogelholm et al <sup>18</sup>     | 8 weeks                      |
| Newhouse et al <sup>34</sup>      | 8 weeks                      |
| Peeling et al <sup>36</sup>       | 28 days                      |
| Klingshirn et al <sup>28</sup>    | 8 weeks                      |

<sup>a</sup>Shaded cells indicate studies with no improvement in performance.
